# Supplementary material
Source: PubMed Central journal article supplement (PMC6409124)
Supplement: NIHMS1506227-supplement-1.pdf [file NIHMS1506227-supplement-1.pdf]

**Supplemental Table 1: p values for Gene Expression Data Assessed for the Two Different Definitions of Histologic Response to Treatment**

| Gene name | Nominal p values                        |                                                |
|-----------|-----------------------------------------|------------------------------------------------|
|           | $\geq 15$ eos/hpf vs<br>$< 15$ eos/hpf) | $< 50\%$ decrease eos/hpf<br>vs $< 1$ eos/hpf) |
| GCNT3     | 0.41275344                              | 0.836335116                                    |
| GRPEL2    | 0.2736872                               | 0.501577942                                    |
| ALOX12    | 0.73834588                              | 0.836762878                                    |
| CCL26     | 0.71209473                              | 0.80034951                                     |
| ANO1      | 0.8199528                               | 0.64063121                                     |
| TSPAN12   | 0.55761749                              | 0.529834832                                    |
| MSRB3     | 0.13744655                              | 0.062591649                                    |
| MMP12     | 0.29263246                              | 0.669878799                                    |
| CRYM      | 0.55310523                              | 0.190433457                                    |
| RTP4      | 0.29418539                              | 0.798346884                                    |
| EPB41L3   | 0.46078475                              | 0.714103453                                    |
| MT1M      | 0.24741827                              | 0.512194647                                    |
| 18S       | 0.84970044                              | 0.737755397                                    |
| RUNX2     | 0.51892836                              | 0.811314796                                    |
| KRT23     | 0.01685221                              | 0.161866445                                    |
| CFB       | 0.90091506                              | 0.491051463                                    |
| CLDN10    | 0.44371242                              | 0.436073331                                    |
| SLC26A4   | 0.53859832                              | 0.84442152                                     |
| SYNPO2L   | 0.51775961                              | 0.532412241                                    |
| SAMSN1    | 0.11643928                              | 0.546152575                                    |
| CCR3      | 0.3180221                               | 0.480643166                                    |
| PTGFRN    | 0.64894903                              | 0.721757904                                    |
| IGFL1     | 0.69635093                              | 0.378817425                                    |
| CDH20     | 0.32917805                              | 0.35161342                                     |
| EML1      | 0.29265284                              | 0.518058021                                    |
| TSLP      | 0.42026473                              | 0.663304151                                    |
| FLG       | 0.72685757                              | 0.96961821                                     |
| NCAM1     | 0.66583857                              | 0.710575131                                    |
| IL2RA     | 0.43407382                              | 0.966550145                                    |
| NEFM      | 0.54266033                              | 0.753747282                                    |
| H19       | 0.36055271                              | 0.406513133                                    |
| ENDOU     | 0.79992888                              | 0.817542948                                    |
| NEFL      | 0.99898783                              | 0.336919167                                    |
| UPK1B     | 0.97341235                              | 0.255826788                                    |
| CTNNAL1   | 0.42965822                              | 0.306998755                                    |

|               |            |             |
|---------------|------------|-------------|
| PHLDB2        | 0.64033564 | 0.864150908 |
| FCGR3B;FCGR3A | 0.59175283 | 0.843315662 |
| IL13          | 0.44562733 | 0.971563352 |
| SLC16A6       | 0.70982573 | 0.921900638 |
| CRISP2        | 0.35380996 | 0.864699021 |
| CTSC          | 0.23575153 | 0.878678038 |
| CD200R1       | 0.36482518 | 0.522239716 |
| DSG1          | 0.86747058 | 0.914653535 |
| GLDC          | 0.60993279 | 0.789371896 |
| SYNPO2        | 0.75467353 | 0.914081213 |
| ZNF365        | 0.74173926 | 0.999071656 |
| PTGDR2        | 0.37284428 | 0.42771858  |
| GYS2          | 0.78129473 | 0.984560695 |
| NTRK1         | 0.43080725 | 0.806341877 |
| HRH1          | 0.80220358 | 0.620961076 |
| CITED2        | 0.49251269 | 0.868881528 |
| TNFAIP6       | 0.67890851 | 0.751792596 |
| TRIM2         | 0.54325408 | 0.617882049 |
| SPINK7        | 0.77381155 | 0.784054272 |
| SUSD2         | 0.51240453 | 0.523123759 |
| TPSB2;TPSAB1  | 0.29852354 | 0.926968509 |
| KCNJ2         | 0.36870394 | 0.815040722 |
| EPPK1         | 0.75228612 | 0.721210948 |
| ACTG2         | 0.41504233 | 0.573051582 |
| ARG1          | 0.80869731 | 0.957057014 |
| CXCL6         | 0.37237289 | 0.532584396 |
| IL4           | 0.0856738  | 0.324738448 |
| HILPDA        | 0.61056966 | 0.779413171 |
| MUC4          | 0.71638411 | 0.781685886 |
| CDA           | 0.4725825  | 0.941516159 |
| CMA1          | 0.17093481 | 0.365902327 |
| ACPP          | 0.66839777 | 0.434086229 |
| CHL1          | 0.42715795 | 0.856146064 |
| CDH26         | 0.40036472 | 0.845864626 |
| ALOX15        | 0.70257712 | 0.9048014   |
| CA2           | 0.13328594 | 0.403336222 |
| PMCH          | 0.98358685 | 0.701113945 |
| GPR160        | 0.26324634 | 0.54485627  |
| IL5           | 0.09890085 | 0.317641782 |
| F3            | 0.62659751 | 0.80206025  |

|          |            |             |
|----------|------------|-------------|
| CD3G     | 0.25830244 | 0.334922503 |
| IL8      | 0.31164433 | 0.656950672 |
| COL8A2   | 0.98092289 | 0.575118    |
| APOBEC3A | 0.06177775 | 0.349483846 |
| CLC      | 0.41494386 | 0.964060315 |
| CFI      | 0.24338272 | 0.620543067 |
| CRISP3   | 0.93663749 | 0.775042996 |
| UPK1A    | 0.65428275 | 0.840565529 |
| IL5RA    | 0.54697145 | 0.839666839 |
| GRK5     | 0.54191773 | 0.934021899 |
| IGJ      | 0.26515439 | 0.298529959 |
| FKBP5    | 0.65440558 | 0.665535617 |
| POSTN    | 0.313019   | 0.703124638 |
| TGFB1    | 0.2219554  | 0.554008381 |
| CXCL1    | 0.67387422 | 0.566644623 |
| PNLIPRP3 | 0.86060026 | 0.918953102 |
| UBD      | 0.73041186 | 0.650425784 |
| CPA3     | 0.86892233 | 0.675626393 |
| LRRC31   | 0.87068942 | 0.739868452 |
| HPGDS    | 0.22750696 | 0.682500319 |

---
